# Supplementary material for: Sex difference in BAT thermogenesis depends on PGC-1α-ChREBPβ mediated de novo lipogenesis in mice
Source: Research Square preprint supplement (doi:10.21203/rs.3.rs-3968646/v1), 2024-03-13
Supplement: Supplementary file 1 [file a793e140ac357b2414b3e3f7.xlsx]

## Sheet: Sheet1
	Table S1. Mouse primers used in this study.
	Gene	Forward primer(5'-3')	Reverse primer(5'-3')
	Ppargc1a	AGCCGTGACCACTGACAACGAG	GCTGCATGGTTCTGAGTGCTAAG
	Adcy3	AGGATGAGCTGGAAGGGATG	AGGTAGAGGAAGACGTTGGC
	Nrf1	ACATTGGCTGATGCTTCAGAA	TGCGTCGTCTGGATGGTCAT
	Tfam	TCTATCAGTCTTGTCTGTATTCCGAAGT	TGGATAGCTACCCATGCTGGA
	Mfn1	AGGGGACCGATGGAGATAAAG	AAGAGGGCACATTTTGCTTTG
	Mfn2	ACGTCAAAGGGTACCTGTCCA	CAATCCCAGATGGCAGAACTT
	Opa1	TCACCTCTGCGTTTATTTGAAGA	GGGTAGAACGGGAGGAAAGG
	Drp1	GGGCACTTAAATTGGGCTCC	TGTATTCTGTTGGCGTGGAAC
	Chrebpb	TCTGCAGATCGCGTGGAG	CTTGTCCCGGCATAGCAAC
	Acly	CTCACACGGAAGCTCCATAA	ACGCCCTCATAGACACCATC
	Acss2	GCTTCTTTCCCATTCTTCGGT	CCCGGACTCATTCAGGATTG
	Fasn	CCTGGATAGCATTCCGAACCT	AGCACATCTCGAAGGCTACACA
	Acaca	GGAGATGTACGCTGACCGAGAA	ACCCGACGCATGGTTTTCA
	Elovl6	TCAGCAAAGCACCCGAAC	AGCGACCATGTCTTTGTAGGAG
	Esr1	CTTGGAAGGCCGAAATGAAATG	GGCAGGGCTATTCTTCTTAGTG
